# Supplementary material for: Polymorphism rs7214723 in CAMKK1: a new genetic variant associated with cardiovascular diseases
Source: Oxford University Press journal article supplement (doi:10.1042/bsr20210326), 2021-06-24
Supplement: bsr-2021-0326_supp.pdf [file bsr-2021-0326_supp.pdf]

**SUPPLEMENTARY MATERIAL**

**Polymorphism rs7214723 in CAMKK1: a new genetic variant associated with cardiovascular diseases.**

Sofia Beghi<sup>1</sup>, Francesca Cavaliere<sup>2</sup>, Matteo Manfredini<sup>1</sup>, Sandro Ferrarese<sup>3</sup>, Claudio Corazzari<sup>3</sup>, Cesare Beghi<sup>3</sup>, Annamaria Buschini<sup>1\*</sup>

<sup>1</sup> University of Parma; Department of Chemistry, Life Sciences, and Environmental Sustainability; Parco Area delle Scienze 11A; 43124 Parma; Italy

<sup>2</sup> University of Parma; Department of Food and Drug; Parco Area delle Scienze 27A; 43124 Parma; Italy

<sup>3</sup> Department of Cardiac Surgery, Circolo Hospital, University of Insubria, Varese, Italy.

**Table S1** - Number of subjects, allelic and genotypic frequency distributions of the populations under study. CAD (coronary artery disease); NOCAD (no coronary artery disease); AS (aortic stenosis); NOAS (no aortic stenosis).

| Population (n. subjects)      | Allelic frequency (count)    | Genotypic frequency (count)                     | p value (genotypic frequency)             |
|-------------------------------|------------------------------|-------------------------------------------------|-------------------------------------------|
| European population (503)     | T: 55% (560)<br>C: 45% (446) | TT: 32% (160)<br>CC: 20% (103)<br>CT: 48% (240) | EUR vs Cardiopathic population<br>p=0.000 |
| Cardiopathic population (300) | T: 43% (259)<br>C: 57% (341) | TT: 11% (33)<br>CC: 25% (74)<br>CT: 64% (193)   |                                           |
| CAD (150)                     | T: 46% (137)<br>C: 54% (163) | TT: 14% (21)<br>CC: 22% (34)<br>CT: 63% (95)    | CAD vs NOCAD<br>p= 0.225                  |
| NOCAD (150)                   | T: 40% (122)<br>C: 60% (178) | TT: 8% (12)<br>CC: 27% (40)<br>CT: 65% (98)     |                                           |
| AS (107)                      | T: 49% (103)<br>C: 51% (111) | TT: 14% (16)<br>CC: 19% (20)<br>CT: 67% (71)    | AS vs. NOAS<br>p=0.08                     |
| NOAS (193)                    | T: 40% (156)<br>C: 60% (230) | TT: 9% (17)<br>CC: 28% (54)<br>CT: 63% (122)    |                                           |

**Table S1** - Number of subjects, allelic and genotypic frequency distributions of the populations under study. CAD (coronary artery disease); NOCAD (no coronary artery disease); AS (aortic stenosis); NOAS (no aortic stenosis).
